# Supplementary material for: Comparative Study of the Lipophilicity of Selected Anti-Androgenic and Blood Uric Acid Lowering Compounds
Source: MDPI journal article supplement (doi:10.3390/molecules28010166), 2022-12-25
Supplement: s1 [file s1]

**Table S1.** Data for linear correlation (Equation 1) between  $R_M$  values and the content of organic modifier in the mobile phase for allopurinol. Where: correlation coefficient ( $R^2$ ), standard error of estimation (SEE); F-factor; significance level (p), volume fraction of organic modifier in mobile phase ( $\phi$ ).

| Ethanol – water (v/v)      |                      |                      |       |        |        |        |             |
|----------------------------|----------------------|----------------------|-------|--------|--------|--------|-------------|
| Stationary phase           | $R_{MW\pm SE}$       | $b\pm SE$            | $R^2$ | SEE    | F      | p      | $\phi$      |
| RP18F <sub>254</sub>       | 0.2164 $\pm$ 0.0923  | -1.7360 $\pm$ 0.2176 | 95.50 | 0.0688 | 63.61  | 0.0041 | 0.20 – 0.80 |
| RP18WF <sub>254</sub>      | 0.2321 $\pm$ 0.0541  | -1.8966 $\pm$ 0.1125 | 98.61 | 0.0471 | 284.21 | 0.0001 | 0.20 – 0.70 |
| RP2F <sub>254</sub>        | 0.4000 $\pm$ 0.1346  | -2.2336 $\pm$ 0.2500 | 94.10 | 0.1323 | 79.81  | 0.0003 | 0.20 – 0.80 |
| Acetonitrile – water (v/v) |                      |                      |       |        |        |        |             |
| Stationary phase           | $R_{MW\pm SE}$       | $b\pm SE$            | $R^2$ | SEE    | F      | p      | $\phi$      |
| RP18F <sub>254</sub>       | -0.0737 $\pm$ 0.0706 | -1.0200 $\pm$ 0.1185 | 92.51 | 0.0768 | 74.10  | 0.0001 | 0.20 – 0.90 |
| RP18WF <sub>254</sub>      | -0.1744 $\pm$ 0.0499 | -0.8414 $\pm$ 0.0927 | 94.28 | 0.0490 | 82.41  | 0.0003 | 0.20 – 0.80 |
| RP2F <sub>254</sub>        | 0.2783 $\pm$ 0.0856  | -2.8830 $\pm$ 0.2330 | 98.71 | 0.0521 | 153.23 | 0.0065 | 0.20 – 0.50 |
| Propan-2-ol – water (v/v)  |                      |                      |       |        |        |        |             |
| Stationary phase           | $R_{MW\pm SE}$       | $b\pm SE$            | $R^2$ | SEE    | F      | p      | $\phi$      |
| RP18F <sub>254</sub>       | 0.0399 $\pm$ 0.0767  | -1.4000 $\pm$ 0.1425 | 95.08 | 0.0754 | 96.56  | 0.0002 | 0.20 – 0.80 |
| RP18WF <sub>254</sub>      | -0.0722 $\pm$ 0.1766 | -1.2343 $\pm$ 0.3670 | 73.87 | 0.1535 | 11.31  | 0.0282 | 0.20 – 0.70 |
| RP2F <sub>254</sub>        | -0.0849 $\pm$ 0.1014 | -1.2114 $\pm$ 0.2106 | 89.21 | 0.0881 | 33.07  | 0.0045 | 0.20 – 0.70 |

**Table S2.** Data for linear correlation (Equation 1) between  $R_M$  values and the content of organic modifier in the mobile phase for oxypurinol. Where: correlation coefficient ( $R^2$ ), standard error of estimation (SEE); F-factor; significance level (p), volume fraction of organic modifier in mobile phase ( $\phi$ ).

| Ethanol – water (v/v)      |                      |                      |       |        |         |        |             |
|----------------------------|----------------------|----------------------|-------|--------|---------|--------|-------------|
| Stationary phase           | $R_{MW\pm SE}$       | $b\pm SE$            | $R^2$ | SEE    | F       | p      | $\phi$      |
| RP18F <sub>254</sub>       | 0.1808 $\pm$ 0.0699  | -2.0100 $\pm$ 0.1647 | 98.02 | 0.0521 | 148.92  | 0.0012 | 0.20 – 0.60 |
| RP18WF <sub>254</sub>      | -0.0346 $\pm$ 0.2414 | -2.4520 $\pm$ 0.5016 | 85.66 | 0.2098 | 23.89   | 0.0081 | 0.20 – 0.70 |
| RP2F <sub>254</sub>        | -0.5431 $\pm$ 0.1278 | -1.2830 $\pm$ 0.2459 | 90.07 | 0.0777 | 27.23   | 0.0137 | 0.30 – 0.70 |
| Acetonitrile – water (v/v) |                      |                      |       |        |         |        |             |
| Stationary phase           | $R_{MW\pm SE}$       | $b\pm SE$            | $R^2$ | SEE    | F       | p      | $\phi$      |
| RP18F <sub>254</sub>       | 0.3765 $\pm$ 0.2038  | -1.6590 $\pm$ 0.2853 | 91.85 | 0.0902 | 33.81   | 0.0101 | 0.50 – 0.90 |
| RP18WF <sub>254</sub>      | -0.2654 $\pm$ 0.0719 | -0.9406 $\pm$ 0.1493 | 90.84 | 0.0625 | 39.69   | 0.0032 | 0.20 – 0.70 |
| RP2F <sub>254</sub>        | 0.7764 $\pm$ 0.2288  | -4.2400 $\pm$ 0.5394 | 95.37 | 0.1706 | 61.79   | 0.0043 | 0.20 – 0.60 |
| Propan-2-ol – water (v/v)  |                      |                      |       |        |         |        |             |
| Stationary phase           | $R_{MW\pm SE}$       | $b\pm SE$            | $R^2$ | SEE    | F       | p      | $\phi$      |
| RP18F <sub>254</sub>       | -0.3749 $\pm$ 0.1099 | -0.7752 $\pm$ 0.1844 | 74.65 | 0.1195 | 17.67   | 0.0057 | 0.20 – 0.90 |
| RP18WF <sub>254</sub>      | -0.5789 $\pm$ 0.0057 | -0.3514 $\pm$ 0.0099 | 99.92 | 0.0021 | 1260.75 | 0.0179 | 0.40 – 0.70 |
| RP2F <sub>254</sub>        | -0.1945 $\pm$ 0.0862 | -1.1849 $\pm$ 0.1451 | 97.09 | 0.0429 | 66.64   | 0.0147 | 0.40 – 0.80 |

**Table S3.** Data for linear correlation (Equation 1) between  $R_M$  values and the content of organic modifier in the mobile phase for febuxostat. Where: correlation coefficient ( $R^2$ ), standard error of estimation (SEE); F-factor; significance level (p), volume fraction of organic modifier in mobile phase ( $\phi$ ).

| Ethanol – water (v/v)      |                     |                      |       |        |        |        |             |
|----------------------------|---------------------|----------------------|-------|--------|--------|--------|-------------|
| Stationary phase           | $R_{MW} \pm SE$     | $b \pm SE$           | $R^2$ | SEE    | F      | p      | $\phi$      |
| RP18F <sub>254</sub>       | 2.7106 $\pm$ 0.2849 | -4.4626 $\pm$ 0.4947 | 95.31 | 0.2069 | 81.37  | 0.0008 | 0.30 – 0.80 |
| RP18WF <sub>254</sub>      | 2.0687 $\pm$ 0.3224 | -3.9743 $\pm$ 0.5986 | 89.81 | 0.3167 | 44.08  | 0.0012 | 0.20 – 0.80 |
| RP2F <sub>254</sub>        | 1.9788 $\pm$ 0.3416 | -3.9960 $\pm$ 0.5931 | 91.90 | 0.2481 | 45.39  | 0.0025 | 0.30 – 0.80 |
| Acetonitrile – water (v/v) |                     |                      |       |        |        |        |             |
| Stationary phase           | $R_{MW} \pm SE$     | $b \pm SE$           | $R^2$ | SEE    | F      | p      | $\phi$      |
| RP18F <sub>254</sub>       | 1.9061 $\pm$ 0.1300 | -2.7420 $\pm$ 0.1934 | 98.05 | 0.0809 | 201.05 | 0.0001 | 0.40 – 0.90 |
| RP18WF <sub>254</sub>      | 1.5489 $\pm$ 0.0517 | -2.7251 $\pm$ 0.0868 | 99.39 | 0.0563 | 985.48 | 0.0000 | 0.20 – 0.90 |
| RP2F <sub>254</sub>        | 1.5648 $\pm$ 0.1540 | -3.0405 $\pm$ 0.2584 | 95.85 | 0.1675 | 138.45 | 0.0000 | 0.20 – 0.90 |
| Propan-2-ol – water (v/v)  |                     |                      |       |        |        |        |             |
| Stationary phase           | $R_{MW} \pm SE$     | $b \pm SE$           | $R^2$ | SEE    | F      | p      | $\phi$      |
| RP18F <sub>254</sub>       | 1.9112 $\pm$ 0.2491 | -3.2326 $\pm$ 0.4182 | 90.88 | 0.2710 | 59.76  | 0.0002 | 0.20 – 0.90 |
| RP18WF <sub>254</sub>      | 1.2259 $\pm$ 0.1424 | -2.4143 $\pm$ 0.2390 | 94.45 | 0.1549 | 102.08 | 0.0001 | 0.20 – 0.90 |
| RP2F <sub>254</sub>        | 1.2524 $\pm$ 0.1654 | -2.7598 $\pm$ 0.2776 | 94.27 | 0.1799 | 98.79  | 0.0001 | 0.20 – 0.90 |

**Table S4.** Data for linear correlation (Equation 1) between  $R_M$  values and the content of organic modifier in the mobile phase for abiraterone. Where: correlation coefficient ( $R^2$ ), standard error of estimation (SEE); F-factor; significance level (p), volume fraction of organic modifier in mobile phase ( $\phi$ ).

| Ethanol – water (v/v)      |                     |                      |       |        |        |        |             |
|----------------------------|---------------------|----------------------|-------|--------|--------|--------|-------------|
| Stationary phase           | $R_{MW} \pm SE$     | $b \pm SE$           | $R^2$ | SEE    | F      | p      | $\phi$      |
| RP18F <sub>254</sub>       | 4.5660 $\pm$ 0.7096 | -4.7950 $\pm$ 0.9359 | 92.92 | 0.2093 | 26.25  | 0.0360 | 0.60 – 0.90 |
| RP18WF <sub>254</sub>      | 3.8765 $\pm$ 0.3779 | -4.4090 $\pm$ 0.4984 | 97.51 | 0.1114 | 78.27  | 0.0125 | 0.60 – 0.90 |
| RP2F <sub>254</sub>        | 4.3012 $\pm$ 0.5620 | -5.4360 $\pm$ 0.7869 | 94.08 | 0.2488 | 47.72  | 0.0062 | 0.50 – 0.90 |
| Acetonitrile – water (v/v) |                     |                      |       |        |        |        |             |
| Stationary phase           | $R_{MW} \pm SE$     | $b \pm SE$           | $R^2$ | SEE    | F      | p      | $\phi$      |
| RP18F <sub>254</sub>       | 1.8373 $\pm$ 0.0580 | -0.6650 $\pm$ 0.0722 | 98.84 | 0.0102 | 84.91  | 0.0688 | 0.70 – 0.90 |
| RP18WF <sub>254</sub>      | 2.4400 $\pm$ 0.0824 | -2.0930 $\pm$ 0.1087 | 99.46 | 0.0243 | 370.52 | 0.0027 | 0.40 – 0.90 |
| RP2F <sub>254</sub>        | 2.7366 $\pm$ 0.2768 | -3.1920 $\pm$ 0.3876 | 95.76 | 0.1226 | 67.82  | 0.0037 | 0.50 – 0.90 |
| Propan-2-ol – water (v/v)  |                     |                      |       |        |        |        |             |
| Stationary phase           | $R_{MW} \pm SE$     | $b \pm SE$           | $R^2$ | SEE    | F      | p      | $\phi$      |
| RP18F <sub>254</sub>       | 3.0060 $\pm$ 0.2713 | -3.6220 $\pm$ 0.3800 | 96.80 | 0.1202 | 90.87  | 0.0024 | 0.50 – 0.90 |
| RP18WF <sub>254</sub>      | 2.0141 $\pm$ 0.3497 | -2.4610 $\pm$ 0.4897 | 89.38 | 0.1549 | 25.25  | 0.0152 | 0.50 – 0.90 |
| RP2F <sub>254</sub>        | 2.5179 $\pm$ 0.2130 | -3.6837 $\pm$ 0.3170 | 97.12 | 0.1326 | 135.05 | 0.0003 | 0.40 – 0.90 |

**Table S5.** Data for linear correlation (Equation 1) between  $R_M$  values and the content of organic modifier in the mobile phase for bicalutamide. Where: correlation coefficient ( $R^2$ ), standard error of estimation (SEE); F-factor; significance level (p), volume fraction of organic modifier in mobile phase ( $\phi$ ).

| <b>Ethanol – water (v/v)</b>      |                                   |                              |                         |            |          |          |                          |
|-----------------------------------|-----------------------------------|------------------------------|-------------------------|------------|----------|----------|--------------------------|
| <b>Stationary phase</b>           | <b><math>R_{MW} \pm SE</math></b> | <b><math>b \pm SE</math></b> | <b><math>R^2</math></b> | <b>SEE</b> | <b>F</b> | <b>p</b> | <b><math>\phi</math></b> |
| RP18F <sub>254</sub>              | 3.1861 $\pm$ 0.7150               | -5.1317 $\pm$ 1.0638         | 85.33                   | 0.4450     | 23.27    | 0.0085   | 0.40 – 0.90              |
| RP18WF <sub>254</sub>             | 2.8711 $\pm$ 0.2530               | -4.7611 $\pm$ 0.3765         | 97.56                   | 0.1575     | 159.94   | 0.0002   | 0.40 – 0.90              |
| RP2F <sub>254</sub>               | 2.8044 $\pm$ 0.2780               | -4.5411 $\pm$ 0.4136         | 96.79                   | 0.1730     | 120.55   | 0.0004   | 0.40 – 0.90              |
| <b>Acetonitrile – water (v/v)</b> |                                   |                              |                         |            |          |          |                          |
| <b>Stationary phase</b>           | <b><math>R_{MW} \pm SE</math></b> | <b><math>b \pm SE</math></b> | <b><math>R^2</math></b> | <b>SEE</b> | <b>F</b> | <b>p</b> | <b><math>\phi</math></b> |
| RP18F <sub>254</sub>              | 4.0113 $\pm$ 0.3574               | -6.3340 $\pm$ 0.5318         | 97.26                   | 0.2225     | 141.86   | 0.0003   | 0.40 – 0.90              |
| RP18WF <sub>254</sub>             | 2.8946 $\pm$ 0.2591               | -4.9186 $\pm$ 0.3855         | 97.60                   | 0.1613     | 162.77   | 0.0002   | 0.40 – 0.90              |
| RP2F <sub>254</sub>               | 3.0843 $\pm$ 0.1717               | -5.1040 $\pm$ 0.2555         | 99.01                   | 0.1069     | 399.13   | 0.0000   | 0.40 – 0.90              |
| <b>Propan-2-ol – water (v/v)</b>  |                                   |                              |                         |            |          |          |                          |
| <b>Stationary phase</b>           | <b><math>R_{MW} \pm SE</math></b> | <b><math>b \pm SE</math></b> | <b><math>R^2</math></b> | <b>SEE</b> | <b>F</b> | <b>p</b> | <b><math>\phi</math></b> |
| RP18F <sub>254</sub>              | 2.7550 $\pm$ 0.4628               | -5.3240 $\pm$ 0.7507         | 94.37                   | 0.2374     | 50.29    | 0.0058   | 0.40 – 0.80              |
| RP18WF <sub>254</sub>             | 1.4439 $\pm$ 0.4882               | -2.9134 $\pm$ 0.7265         | 80.08                   | 0.3039     | 16.08    | 0.0160   | 0.40 – 0.90              |
| RP2F <sub>254</sub>               | 1.9488 $\pm$ 0.1060               | -3.9310 $\pm$ 0.1720         | 99.43                   | 0.0544     | 522.13   | 0.0002   | 0.40 – 0.80              |

**Table S6.** Data for linear correlation (Equation 1) between  $R_M$  values and the content of organic modifier in the mobile phase for flutamide. Where: correlation coefficient ( $R^2$ ), standard error of estimation (SEE); F-factor; significance level (p), volume fraction of organic modifier in mobile phase ( $\phi$ ).

| <b>Ethanol – water (v/v)</b>      |                                   |                              |                         |            |          |          |                          |
|-----------------------------------|-----------------------------------|------------------------------|-------------------------|------------|----------|----------|--------------------------|
| <b>Stationary phase</b>           | <b><math>R_{MW} \pm SE</math></b> | <b><math>b \pm SE</math></b> | <b><math>R^2</math></b> | <b>SEE</b> | <b>F</b> | <b>p</b> | <b><math>\phi</math></b> |
| RP18F <sub>254</sub>              | 3.1037 $\pm$ 0.2366               | -4.4163 $\pm$ 0.3520         | 97.52                   | 0.1473     | 157.37   | 0.0002   | 0.40 – 0.90              |
| RP18WF <sub>254</sub>             | 2.9650 $\pm$ 0.2815               | -4.5594 $\pm$ 0.4189         | 96.73                   | 0.1753     | 118.45   | 0.0004   | 0.40 – 0.90              |
| RP2F <sub>254</sub>               | 2.9756 $\pm$ 0.3050               | -4.5286 $\pm$ 0.4539         | 96.14                   | 0.1899     | 99.55    | 0.0006   | 0.40 – 0.90              |
| <b>Acetonitrile – water (v/v)</b> |                                   |                              |                         |            |          |          |                          |
| <b>Stationary phase</b>           | <b><math>R_{MW} \pm SE</math></b> | <b><math>b \pm SE</math></b> | <b><math>R^2</math></b> | <b>SEE</b> | <b>F</b> | <b>p</b> | <b><math>\phi</math></b> |
| RP18F <sub>254</sub>              | 3.3395 $\pm$ 0.2534               | -4.8223 $\pm$ 0.3771         | 97.61                   | 0.1577     | 163.57   | 0.0002   | 0.40 – 0.90              |
| RP18WF <sub>254</sub>             | 2.7053 $\pm$ 0.1620               | -4.4240 $\pm$ 0.2410         | 98.83                   | 0.1008     | 336.99   | 0.0001   | 0.40 – 0.90              |
| RP2F <sub>254</sub>               | 2.6436 $\pm$ 0.1123               | -4.2146 $\pm$ 0.1671         | 99.37                   | 0.0699     | 636.08   | 0.0000   | 0.40 – 0.90              |
| <b>Propan-2-ol – water (v/v)</b>  |                                   |                              |                         |            |          |          |                          |
| <b>Stationary phase</b>           | <b><math>R_{MW} \pm SE</math></b> | <b><math>b \pm SE</math></b> | <b><math>R^2</math></b> | <b>SEE</b> | <b>F</b> | <b>p</b> | <b><math>\phi</math></b> |
| RP18F <sub>254</sub>              | 2.2432 $\pm$ 0.2168               | -3.8526 $\pm$ 0.3226         | 97.27                   | 0.1350     | 142.61   | 0.0003   | 0.40 – 0.90              |
| RP18WF <sub>254</sub>             | 1.7854 $\pm$ 0.3287               | -3.1654 $\pm$ 0.4892         | 91.28                   | 0.2046     | 41.88    | 0.0029   | 0.40 – 0.90              |
| RP2F <sub>254</sub>               | 2.4137 $\pm$ 0.2010               | -4.4551 $\pm$ 0.2990         | 98.23                   | 0.1251     | 221.94   | 0.0001   | 0.40 – 0.90              |

**Table S7.** Data for linear correlation (Equation 1) between  $R_M$  values and the content of organic modifier in the mobile phase for nilutamide. Where: correlation coefficient ( $R^2$ ), standard error of estimation (SEE); F-factor; significance level (p), volume fraction of organic modifier in mobile phase ( $\phi$ ).

| Ethanol – water (v/v)      |                     |                      |       |        |        |        |             |
|----------------------------|---------------------|----------------------|-------|--------|--------|--------|-------------|
| Stationary phase           | $R_{MW} \pm SE$     | $b \pm SE$           | $R^2$ | SEE    | F      | p      | $\phi$      |
| RP18F <sub>254</sub>       | 2.8873 $\pm$ 0.2044 | -4.3151 $\pm$ 0.3041 | 98.05 | 0.1272 | 201.29 | 0.0001 | 0.40 – 0.90 |
| RP18WF <sub>254</sub>      | 2.3245 $\pm$ 0.1433 | -3.6883 $\pm$ 0.2132 | 98.68 | 0.0892 | 299.35 | 0.0001 | 0.40 – 0.90 |
| RP2F <sub>254</sub>        | 3.0454 $\pm$ 0.2606 | -4.2900 $\pm$ 0.3649 | 97.87 | 0.1154 | 138.19 | 0.0013 | 0.50 – 0.90 |
| Acetonitrile – water (v/v) |                     |                      |       |        |        |        |             |
| Stationary phase           | $R_{MW} \pm SE$     | $b \pm SE$           | $R^2$ | SEE    | F      | p      | $\phi$      |
| RP18F <sub>254</sub>       | 3.1543 $\pm$ 0.2336 | -5.1300 $\pm$ 0.3476 | 98.20 | 0.1454 | 217.84 | 0.0001 | 0.40 – 0.90 |
| RP18WF <sub>254</sub>      | 2.3260 $\pm$ 0.2136 | -4.0246 $\pm$ 0.3178 | 97.57 | 0.1329 | 160.41 | 0.0002 | 0.40 – 0.90 |
| RP2F <sub>254</sub>        | 2.7675 $\pm$ 0.1070 | -4.7374 $\pm$ 0.1592 | 99.55 | 0.0666 | 885.30 | 0.0000 | 0.40 – 0.90 |
| Propan-2-ol – water (v/v)  |                     |                      |       |        |        |        |             |
| Stationary phase           | $R_{MW} \pm SE$     | $b \pm SE$           | $R^2$ | SEE    | F      | p      | $\phi$      |
| RP18F <sub>254</sub>       | 1.9313 $\pm$ 0.2861 | -3.5194 $\pm$ 0.4257 | 94.47 | 0.1781 | 68.33  | 0.0012 | 0.40 – 0.90 |
| RP18WF <sub>254</sub>      | 1.4803 $\pm$ 0.3582 | -2.6889 $\pm$ 0.5330 | 86.42 | 0.2230 | 25.45  | 0.0073 | 0.40 – 0.90 |
| RP2F <sub>254</sub>        | 2.1987 $\pm$ 0.1545 | -4.2757 $\pm$ 0.2299 | 98.86 | 0.0962 | 345.94 | 0.0000 | 0.40 – 0.90 |

**Table S8.** Data for linear correlation (Equation 1) between  $R_M$  values and the content of organic modifier in the mobile phase for leflunomide. Where: correlation coefficient ( $R^2$ ), standard error of estimation (SEE); F-factor; significance level (p), volume fraction of organic modifier in mobile phase ( $\phi$ ).

| Ethanol – water (v/v)      |                     |                      |       |        |         |        |             |
|----------------------------|---------------------|----------------------|-------|--------|---------|--------|-------------|
| Stationary phase           | $R_{MW} \pm SE$     | $b \pm SE$           | $R^2$ | SEE    | F       | p      | $\phi$      |
| RP18F <sub>254</sub>       | 3.5015 $\pm$ 0.3566 | -4.9571 $\pm$ 0.5306 | 95.62 | 0.2220 | 87.29   | 0.0007 | 0.40 – 0.90 |
| RP18WF <sub>254</sub>      | 2.8223 $\pm$ 0.1406 | -4.4094 $\pm$ 0.2092 | 99.11 | 0.0875 | 443.94  | 0.0000 | 0.40 – 0.90 |
| RP2F <sub>254</sub>        | 3.0335 $\pm$ 0.2793 | -4.5871 $\pm$ 0.4156 | 96.82 | 0.1738 | 121.83  | 0.0004 | 0.40 – 0.90 |
| Acetonitrile – water (v/v) |                     |                      |       |        |         |        |             |
| Stationary phase           | $R_{MW} \pm SE$     | $b \pm SE$           | $R^2$ | SEE    | F       | p      | $\phi$      |
| RP18F <sub>254</sub>       | 3.0430 $\pm$ 0.2314 | -4.4600 $\pm$ 0.3444 | 97.67 | 0.1441 | 167.74  | 0.0002 | 0.40 – 0.90 |
| RP18WF <sub>254</sub>      | 2.6675 $\pm$ 0.1872 | -4.3820 $\pm$ 0.2785 | 98.41 | 0.1165 | 247.47  | 0.0001 | 0.40 – 0.90 |
| RP2F <sub>254</sub>        | 2.7559 $\pm$ 0.0730 | -4.3989 $\pm$ 0.1086 | 99.76 | 0.0454 | 1641.20 | 0.0000 | 0.40 – 0.90 |
| Propan-2-ol – water (v/v)  |                     |                      |       |        |         |        |             |
| Stationary phase           | $R_{MW} \pm SE$     | $b \pm SE$           | $R^2$ | SEE    | F       | p      | $\phi$      |
| RP18F <sub>254</sub>       | 2.3386 $\pm$ 0.2911 | -4.0286 $\pm$ 0.4332 | 95.58 | 0.1812 | 86.47   | 0.0007 | 0.40 – 0.90 |
| RP18WF <sub>254</sub>      | 1.8840 $\pm$ 0.4102 | -3.3660 $\pm$ 0.6104 | 88.38 | 0.2553 | 30.41   | 0.0053 | 0.40 – 0.90 |
| RP2F <sub>254</sub>        | 2.5391 $\pm$ 0.2044 | -4.6023 $\pm$ 0.3042 | 98.28 | 0.1273 | 228.89  | 0.0001 | 0.40 – 0.90 |

**Table S9.** Data for linear correlation (Equation 1) between  $R_M$  values and the content of organic modifier in the mobile phase for teriflunomide. Where: correlation coefficient ( $R^2$ ), standard error of estimation (SEE); F-factor; significance level (p), volume fraction of organic modifier in mobile phase ( $\phi$ ).

| Ethanol – water (v/v)      |                     |                      |       |        |        |        |             |
|----------------------------|---------------------|----------------------|-------|--------|--------|--------|-------------|
| Stationary phase           | $R_{MW} \pm SE$     | $b \pm SE$           | $R^2$ | SEE    | F      | p      | $\phi$      |
| RP18F <sub>254</sub>       | 1.9800 $\pm$ 0.5223 | -3.9594 $\pm$ 0.7771 | 86.65 | 0.3251 | 25.96  | 0.0070 | 0.40 – 0.90 |
| RP18WF <sub>254</sub>      | 1.2736 $\pm$ 0.1409 | -3.1334 $\pm$ 0.2096 | 98.24 | 0.0877 | 223.51 | 0.0001 | 0.40 – 0.90 |
| RP2F <sub>254</sub>        | 1.3228 $\pm$ 0.1929 | -3.0120 $\pm$ 0.2871 | 96.49 | 0.1201 | 110.07 | 0.0005 | 0.40 – 0.90 |
| Acetonitrile – water (v/v) |                     |                      |       |        |        |        |             |
| Stationary phase           | $R_{MW} \pm SE$     | $b \pm SE$           | $R^2$ | SEE    | F      | p      | $\phi$      |
| RP18F <sub>254</sub>       | 1.3186 $\pm$ 0.0596 | -2.8164 $\pm$ 0.1027 | 99.87 | 0.0222 | 752.27 | 0.0232 | 0.40 – 0.70 |
| RP18WF <sub>254</sub>      | 1.0250 $\pm$ 0.2466 | -2.5449 $\pm$ 0.3669 | 92.32 | 0.1535 | 48.10  | 0.0023 | 0.40 – 0.90 |
| RP2F <sub>254</sub>        | 0.9696 $\pm$ 0.1000 | -2.7820 $\pm$ 0.1783 | 99.18 | 0.0399 | 243.47 | 0.0041 | 0.40 – 0.70 |
| Propan-2-ol – water (v/v)  |                     |                      |       |        |        |        |             |
| Stationary phase           | $R_{MW} \pm SE$     | $b \pm SE$           | $R^2$ | SEE    | F      | p      | $\phi$      |
| RP18F <sub>254</sub>       | 2.0438 $\pm$ 0.3051 | -4.600 $\pm$ 0.4950  | 96.64 | 0.1565 | 86.36  | 0.0026 | 0.40 – 0.80 |
| RP18WF <sub>254</sub>      | 1.8615 $\pm$ 0.2917 | -4.6750 $\pm$ 0.5197 | 97.59 | 0.1162 | 80.91  | 0.0121 | 0.40 – 0.70 |
| RP2F <sub>254</sub>        | 1.0884 $\pm$ 0.2339 | -3.0920 $\pm$ 0.3795 | 95.68 | 0.1200 | 66.38  | 0.0039 | 0.40 – 0.80 |

**Table S10.** Data for linear correlation (Equation 1) between  $R_M$  values and the content of organic modifier in the mobile phase for aianthone. Where: correlation coefficient ( $R^2$ ), standard error of estimation (SEE); F-factor; significance level (p), volume fraction of organic modifier in mobile phase ( $\phi$ ).

| Ethanol – water (v/v)      |                     |                      |       |        |          |        |             |
|----------------------------|---------------------|----------------------|-------|--------|----------|--------|-------------|
| Stationary phase           | $R_{MW} \pm SE$     | $b \pm SE$           | $R^2$ | SEE    | F        | p      | $\phi$      |
| RP18F <sub>254</sub>       | 0.6137 $\pm$ 0.4460 | -2.3063 $\pm$ 0.6637 | 75.12 | 0.2776 | 12.08    | 0.0255 | 0.40 – 0.90 |
| RP18WF <sub>254</sub>      | 0.3212 $\pm$ 0.1124 | -1.1837 $\pm$ 0.1673 | 92.60 | 0.0700 | 50.06    | 0.0021 | 0.40 – 0.90 |
| RP2F <sub>254</sub>        | 0.8299 $\pm$ 0.3079 | -2.7543 $\pm$ 0.4581 | 90.04 | 0.1916 | 36.15    | 0.0039 | 0.40 – 0.90 |
| Acetonitrile – water (v/v) |                     |                      |       |        |          |        |             |
| Stationary phase           | $R_{MW} \pm SE$     | $b \pm SE$           | $R^2$ | SEE    | F        | p      | $\phi$      |
| RP18F <sub>254</sub>       | 0.9749 $\pm$ 0.0122 | -2.3693 $\pm$ 0.0210 | 99.99 | 0.0045 | 12690.30 | 0.0057 | 0.40 – 0.70 |
| RP18WF <sub>254</sub>      | 1.2586 $\pm$ 0.3190 | -2.9270 $\pm$ 0.5683 | 92.99 | 0.1271 | 26.53    | 0.0357 | 0.40 – 0.70 |
| RP2F <sub>254</sub>        | 0.4203 $\pm$ 0.1201 | -1.3760 $\pm$ 0.2139 | 95.39 | 0.0478 | 41.37    | 0.0233 | 0.40 – 0.70 |
| Propan-2-ol – water (v/v)  |                     |                      |       |        |          |        |             |
| Stationary phase           | $R_{MW} \pm SE$     | $b \pm SE$           | $R^2$ | SEE    | F        | p      | $\phi$      |
| RP18F <sub>254</sub>       | 1.7092 $\pm$ 0.5273 | -4.1680 $\pm$ 0.7995 | 93.15 | 0.1788 | 27.18    | 0.0349 | 0.50 – 0.80 |
| RP18WF <sub>254</sub>      | 0.2488 $\pm$ 0.0566 | -1.2410 $\pm$ 0.1009 | 98.69 | 0.0226 | 151.18   | 0.0065 | 0.40 – 0.70 |
| RP2F <sub>254</sub>        | 0.7606 $\pm$ 0.3251 | -3.036 $\pm$ 0.5274  | 91.70 | 0.1668 | 33.13    | 0.0104 | 0.40 – 0.80 |

**Supplementary Materials:** The following materials can be downloaded at: [www.mdpi.com/xxx/s1](http://www.mdpi.com/xxx/s1), Table S1: Data for linear correlation (Equation 1) between  $R_M$  values and the content of organic modifier in the mobile phase for allopurinol. Where: correlation coefficient ( $R^2$ ), standard error of estimation (SEE); F-factor; significance level (p), volume fraction of organic modifier in mobile phase ( $\phi$ ); Table S2: Data for linear correlation (Equation 1) between  $R_M$  values and the content of organic modifier in the mobile phase for oxypurinol. Where: correlation coefficient ( $R^2$ ), standard error of estimation (SEE); F-factor; significance level (p), volume fraction of organic modifier in mobile phase ( $\phi$ ); Table S3: Data for linear correlation (Equation 1) between  $R_M$  values and the content of organic modifier in the mobile phase for febuxostat. Where: correlation coefficient ( $R^2$ ), standard error of estimation (SEE); F-factor; significance level (p), volume fraction of organic modifier in mobile phase ( $\phi$ ); Table S4: Data for linear correlation (Equation 1) between  $R_M$  values and the content of organic modifier in the mobile phase for abiraterone. Where: correlation coefficient ( $R^2$ ), standard error of estimation (SEE); F-factor; significance level (p), volume fraction of organic modifier in mobile phase ( $\phi$ ); Table S5: Data for linear correlation (Equation 1) between  $R_M$  values and the content of organic modifier in the mobile phase for bicalutamide. Where: correlation coefficient ( $R^2$ ), standard error of estimation (SEE); F-factor; significance level (p), volume fraction of organic modifier in mobile phase ( $\phi$ ); Table S6: Data for linear correlation (Equation 1) between  $R_M$  values and the content of organic modifier in the mobile phase for flutamide. Where: correlation coefficient ( $R^2$ ), standard error of estimation (SEE); F-factor; significance level (p), volume fraction of organic modifier in mobile phase ( $\phi$ ); Table S7: Data for linear correlation (Equation 1) between  $R_M$  values and the content of organic modifier in the mobile phase for nilutamide. Where: correlation coefficient ( $R^2$ ), standard error of estimation (SEE); F-factor; significance level (p), volume fraction of organic modifier in mobile phase ( $\phi$ ); Table S8: Data for linear correlation (Equation 1) between  $R_M$  values and the content of organic modifier in the mobile phase for leflunomide. Where: correlation coefficient ( $R^2$ ), standard error of estimation (SEE); F-factor; significance level (p), volume fraction of organic modifier in mobile phase ( $\phi$ ); Table S9: Data for linear correlation (Equation 1) between  $R_M$  values and the content of organic modifier in the mobile phase for teriflunomide. Where: correlation coefficient ( $R^2$ ), standard error of estimation (SEE); F-factor; significance level (p), volume fraction of organic modifier in mobile phase ( $\phi$ ); Table S10: Data for linear correlation (Equation 1) between  $R_M$  values and the content of organic modifier in the mobile phase for aianthone. Where: correlation coefficient ( $R^2$ ), standard error of estimation (SEE); F-factor; significance level (p), volume fraction of organic modifier in mobile phase ( $\phi$ ).
